# Supplementary material for: Eu2+ emission from thermally coupled levels – new frontiers for ultrasensitive luminescence thermometry
Source: Royal Society of Chemistry journal article supplement (doi:10.1039/d1tc05022b), 2021-12-24
Supplement: d1tc05022b1.pdf [file d1tc05022b1.pdf]

## Supporting Information

### Eu<sup>2+</sup> emission from thermally coupled levels – new frontiers for ultrasensitive luminescence thermometry

Małgorzata Sójka,<sup>1</sup> Marcin Runowski,<sup>2,\*</sup> Teng Zheng,<sup>2</sup> Andrii Shyichuk,<sup>1</sup> Dagmara Kulesza,<sup>1</sup>  
Eugeniusz Zych,<sup>1,\*</sup> Stefan Lis<sup>2</sup>

<sup>1</sup>University of Wrocław, Faculty of Chemistry  
14. F. Joliot-Curie Street, 50-383 Wrocław, Poland

<sup>2</sup>Adam Mickiewicz University, Faculty of Chemistry  
Uniwersytetu Poznańskiego 8, 61-614 Poznań, Poland

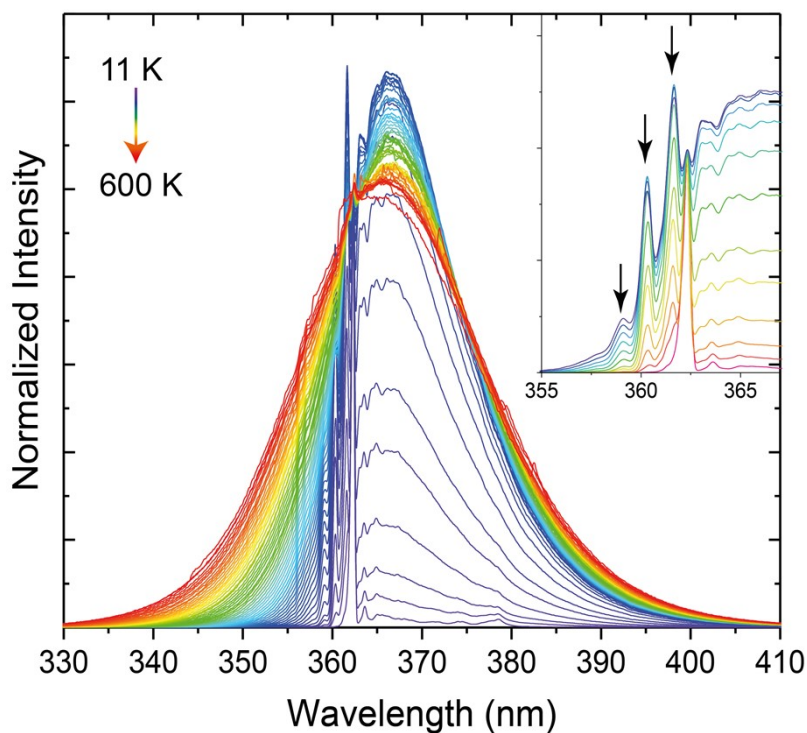

**Figure S1.** The temperature-dependent luminescence spectra of SrB<sub>4</sub>O<sub>7</sub>:Eu<sup>2+</sup> recorded in the range of 11 – 600 K. The inset presents three of Stark components.

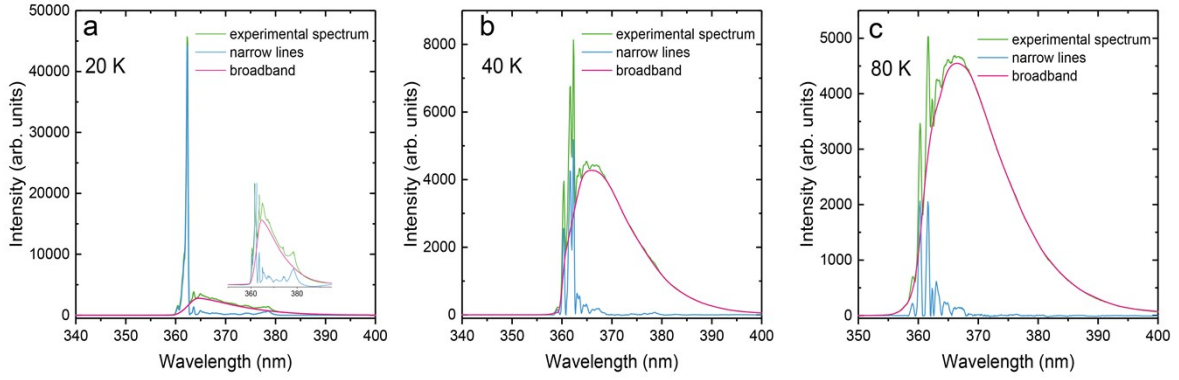

**Figure S2.** Presentation of the strategy of extraction of the broadband luminescence representing presumably the  $5d \rightarrow 4f$  transition and the narrow lines resulting from the  $4f \rightarrow 4f$  transitions complemented with their vibronic components.

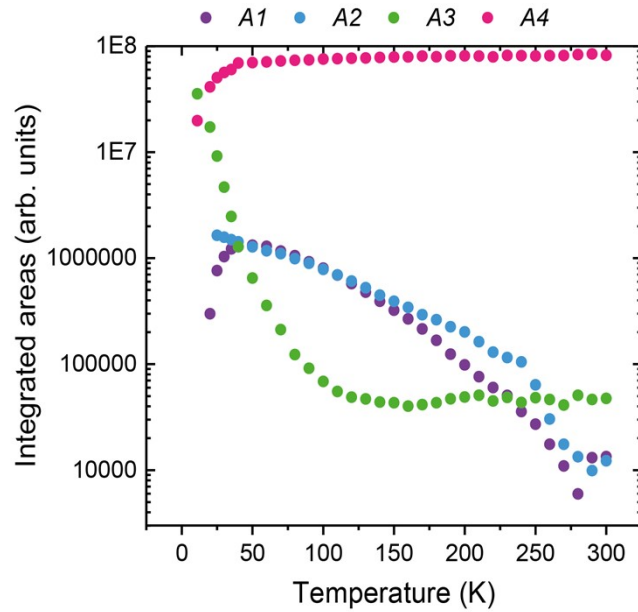

**Figure S3.** Thermal evolution of integrated areas of the  $\text{SrB}_4\text{O}_7:\text{Eu}^{2+}$  phosphor.

**Table S1.** Fitting parameters delivered by the polynomial functions for all  $\Delta$  parameters of the  $\text{SrB}_4\text{O}_7:\text{Eu}^{2+}$  phosphor.

| $\Delta$   | A0    | A1    | A2       | A3      | R <sup>2</sup> |
|------------|-------|-------|----------|---------|----------------|
| $\Delta_1$ | 1.38  | 0.006 | -7.63E-6 | 6.71E-8 | 0.997          |
| $\Delta_2$ | 1.18  | 0.01  | -6.87E-5 | 1.94E-7 | 0.995          |
| $\Delta_3$ | -1.19 | 0.09  | -7.02E-4 | 1.79E-6 | 0.997          |
| $\Delta_4$ | -3.62 | 0.14  | -1.46E-4 | 5.25E-6 | 0.994          |
| $\Delta_5$ | -2.50 | 0.09  | -7.93E-4 | 2.62E-6 | 0.996          |
